# Supplementary material for: Novel Peptides with Dual Properties for Treating Pseudomonas aeruginosa Keratitis: Antibacterial and Corneal Wound Healing
Source: MDPI journal article supplement (doi:10.3390/biom13071028), 2023-06-23
Supplement: s1 [file s1]

Type of the Paper (Article)

# Novel peptides with dual properties for treating *Pseudomonas aeruginosa* keratitis: anti-bacterial and corneal wound healing

Florian Cappiello <sup>1†</sup>, Sudhir Verma <sup>2,3†</sup>, Xiao Lin<sup>2</sup>, Isabel Y. Moreno<sup>2</sup>, Bruno Casciaro<sup>1</sup>, Debarun Dutta<sup>4,5</sup>, Alison M. McDermott<sup>2</sup>, Mark Willcox<sup>4</sup>, Vivien J Coulson-Thomas<sup>2</sup> and Maria Luisa Mangoni <sup>1,\*</sup>

<sup>1</sup> Laboratory affiliated to Pasteur Italia-Fondazione Cenci Bolognetti, Department of Biochemical Sciences, Sapienza University of Rome, Italy; [floriana.cappiello@uniroma1.it](mailto:floriana.cappiello@uniroma1.it) (F.C.), [bruno.casciaro@uniroma1.it](mailto:bruno.casciaro@uniroma1.it) (B.C.), [marialuisa.mangoni@uniroma1.it](mailto:marialuisa.mangoni@uniroma1.it) (M.L.M.)

<sup>2</sup> College of Optometry, University of Houston, Houston, Texas, USA; [sverma20@central.uh.edu](mailto:sverma20@central.uh.edu) (S.V.), [xlin3@central.uh.edu](mailto:xlin3@central.uh.edu) (X.L.), [iymoreno@CougarNet.UH.EDU](mailto:iymoreno@CougarNet.UH.EDU) (I.Y.M.), [dramcdermott@gmail.com](mailto:dramcdermott@gmail.com) (A.M.M); [vjcoulso@central.uh.edu](mailto:vjcoulso@central.uh.edu) (V.J.C.-T.)

<sup>3</sup> Deen Dayal Upadhyaya College, University of Delhi, Delhi, India; [sverma20@central.uh.edu](mailto:sverma20@central.uh.edu) (S.V.)

<sup>4</sup> School of Optometry and Vision Science, University of New South Wales, Sydney, Australia; [d.dutta@aston.ac.uk](mailto:d.dutta@aston.ac.uk) (D.D.), [m.willcox@unsw.edu.au](mailto:m.willcox@unsw.edu.au) (M.W.)

<sup>5</sup> School of Optometry, Aston University, Birmingham, UK; [d.dutta@aston.ac.uk](mailto:d.dutta@aston.ac.uk) (D.D.)

<sup>†</sup> These authors contributed equally to this work

<sup>\*</sup> Correspondence: [marialuisa.mangoni@uniroma1.it](mailto:marialuisa.mangoni@uniroma1.it) (M.L.M); Tel.: +39 06 49910838 Laboratory affiliated to Pasteur Italia-Fondazione Cenci Bolognetti, Department of Biochemical Sciences, Sapienza University of Rome, Italy-00185

**Citation:** To be added by editorial staff during production.

Academic Editor: Firstname Last-name

Received: date

Revised: date

Accepted: date

Published: date

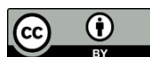

**Copyright:** © 2023 by the authors.

Submitted for possible open access publication under the terms and conditions of the Creative Commons Attribution (CC BY) license (<https://creativecommons.org/licenses/by/4.0/>).

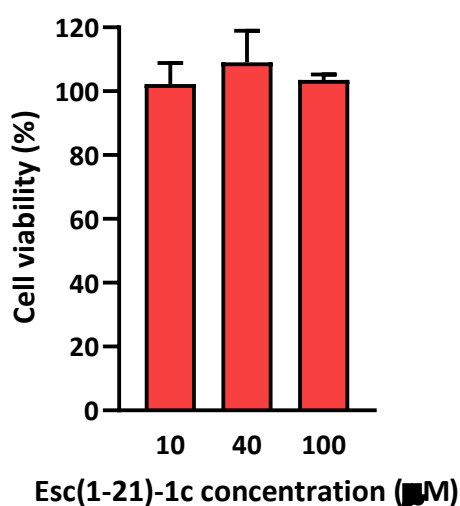

**Figure S1**

Effect of Esc(1-21)-1c on the viability of hTCEpi cells. One hundred  $\mu\text{L}$  of media containing 5,000 cells were plated in each well of a 96-well plate. After 24 h incubation at 37 °C in a 5% CO<sub>2</sub> atmosphere, 10  $\mu\text{L}$  of peptide solution were added into the culture medium of each well to obtain the final concentration of 10, 40 or 100  $\mu\text{M}$ . Cells incubated with media only were used as control. Afterwards, 10  $\mu\text{L}$  of CCK-8 solution were added to each well. The plate was incubated for 3 h. Finally, the absorbance was measured at 450 nm using a microplate reader. Cell viability is expressed as a percentage with respect to the control. All data are the means of three replicates  $\pm$  SEM.
